# Supplementary material for: Salen, salan and salalen zinc(ii) complexes in the interaction with HS−: time-resolved fluorescence applications
Source: Royal Society of Chemistry journal article supplement (doi:10.1039/d2dt03730k), 2023-01-01
Supplement: d2dt03730k1.pdf [file d2dt03730k1.pdf]

## Supporting information.

### Salen, Salan and Salalen zinc(II) complexes in the interaction with HS<sup>-</sup> : time-resolved fluorescence applications.

Maria Strianese<sup>\*a</sup>, Gerard Joseph D'Auria<sup>a</sup>, Marina Lamberti<sup>a</sup>, Alessandro Landi<sup>a</sup>, Andrea Peluso<sup>a</sup>, Antonio Varriale<sup>b,c</sup>, Sabato D'Auria<sup>d</sup>, Claudio Pellecchia<sup>a</sup>.

<sup>a</sup> Dipartimento di Chimica e Biologia "Adolfo Zambelli", Università degli Studi di Salerno, Via Giovanni Paolo II, 132, 84084 Fisciano (SA) Italy; <sup>b</sup> Institute of Food Science, CNR Italy, 83100 Avellino, Italy; <sup>c</sup> URT-ISA, CNR at Department of Biology, University of Naples Federico II, 80126 Napoli, Italy; <sup>db</sup> Department of Biology, Agriculture, and Food Sciences, National Research Council of Italy (CNR-DISBA), Piazzale Aldo Moro 7, 00185 Rome, Italy.

<sup>\*</sup>Corresponding author. E-mail: [mstriane@unisa.it](mailto:mstriane@unisa.it)

### Contents:

|                                                                                               |    |
|-----------------------------------------------------------------------------------------------|----|
| Synthetic procedures for complexes <b>1-3</b>                                                 | 3  |
| Figure S1, Enlargement of the MALDI of complex <b>1</b>                                       | 4  |
| Figure S2, Enlargement of the MALDI of complex <b>2</b>                                       | 5  |
| Figure S3, Enlargement of the MALDI of complex <b>3</b>                                       | 6  |
| Figure S4, <sup>1</sup> H NMR spectrum of complex <b>1</b> in DMSO- <i>d</i> <sub>6</sub>     | 7  |
| Figure S5, <sup>1</sup> H NMR spectrum of complex <b>1</b> in CD <sub>2</sub> Cl <sub>2</sub> | 8  |
| Figure S6, <sup>1</sup> H NMR spectrum of complex <b>2</b> in DMSO- <i>d</i> <sub>6</sub>     | 9  |
| Figure S7, <sup>1</sup> H NMR spectrum of complex <b>3</b> in DMSO- <i>d</i> <sub>6</sub>     | 10 |
| Figure S8, <sup>1</sup> H NMR spectrum of ligand <b>1</b> in DMSO- <i>d</i> <sub>6</sub>      | 11 |
| Figure S9, <sup>1</sup> H NMR spectrum of ligand <b>2</b> in DMSO- <i>d</i> <sub>6</sub>      | 12 |
| Figure S10, <sup>1</sup> H NMR spectrum of ligand <b>3</b> in DMSO- <i>d</i> <sub>6</sub>     | 13 |
| Figure S11, MALDI spectrum of complex <b>1</b> in the presence of NaHS                        | 14 |
| Figure S12, MALDI spectrum of complex <b>2</b> in the presence of NaHS                        | 15 |
| Figure S13, MALDI spectrum of complex <b>3</b> in the presence of NaHS                        | 16 |
| Figure S14, <sup>1</sup> H NMR spectra of complex <b>3</b> free and in the presence of NaHS   | 17 |

|                                                                                                                  |    |
|------------------------------------------------------------------------------------------------------------------|----|
| Figure S15, <sup>1</sup> H NMR spectrum of complex <b>2</b> in DMSO- <i>d</i> <sub>6</sub> upon addition of NaHS | 18 |
| Figure S16, <sup>1</sup> H NMR spectrum of complex <b>2</b> in DMSO- <i>d</i> <sub>6</sub> upon addition of NaHS | 19 |
| Figure S17, <sup>1</sup> H NMR spectrum of complex <b>1</b> in DMSO- <i>d</i> <sub>6</sub> upon addition of NaHS | 20 |
| Figure S18, Emission spectra of ligand <b>2</b> and complex <b>2</b>                                             | 21 |
| Figure S19, Optimized geometries for complex <b>3</b>                                                            | 22 |
| Figure S20, Time-resolved trace for complex <b>3</b>                                                             | 23 |
| Figure S21, Time-resolved trace for complex <b>1</b>                                                             | 24 |
| Figure S22, Time-resolved trace for complex <b>3</b>                                                             | 25 |
| Figure S23, Time-resolved trace for complex <b>3</b>                                                             | 26 |
| Table S1, Photophysical properties for complexes <b>1</b> and <b>3</b>                                           | 27 |
| Table S2, Lifetime measurements for complex <b>3</b>                                                             | 28 |
| Table S3, Lifetime measurements for complex <b>1</b>                                                             | 29 |
| Table S4, Lifetime measurements for complex <b>3</b>                                                             | 30 |
| Table S5, Lifetime measurements for complex <b>3</b>                                                             | 31 |

**Complex 1:** A mixture of the salen ligand (0.278 g, 0.56 mmol) and  $\text{Zn}(\text{Et})_2$  (0.070 g, 0.56 mmol) in 2 mL of dry benzene was left under stirring for 1 h at room temperature. A yellow solid was recovered by drying the reaction mixture under vacuum (yield 75 %).

**Complex 2:** A mixture of the salan ligand (0.28 g, 0.534 mmol) and  $\text{Zn}(\text{Et})_2$  (0.066 g, 0.534 mmol) in 2 mL of dry benzene was left under stirring for 1 h at room temperature. A white solid was recovered by drying the reaction mixture under vacuum (yield 70 %).

**Complex 3:** A mixture of the salalen ligand (0.284 g, 0.558 mmol) and  $\text{Zn}(\text{Et})_2$  (0.069 g, 0.558 mmol) in 3 mL of dry benzene was left under stirring for 1 h at room temperature. A pale yellow solid was recovered by drying the reaction mixture under vacuum (yield 65 %).

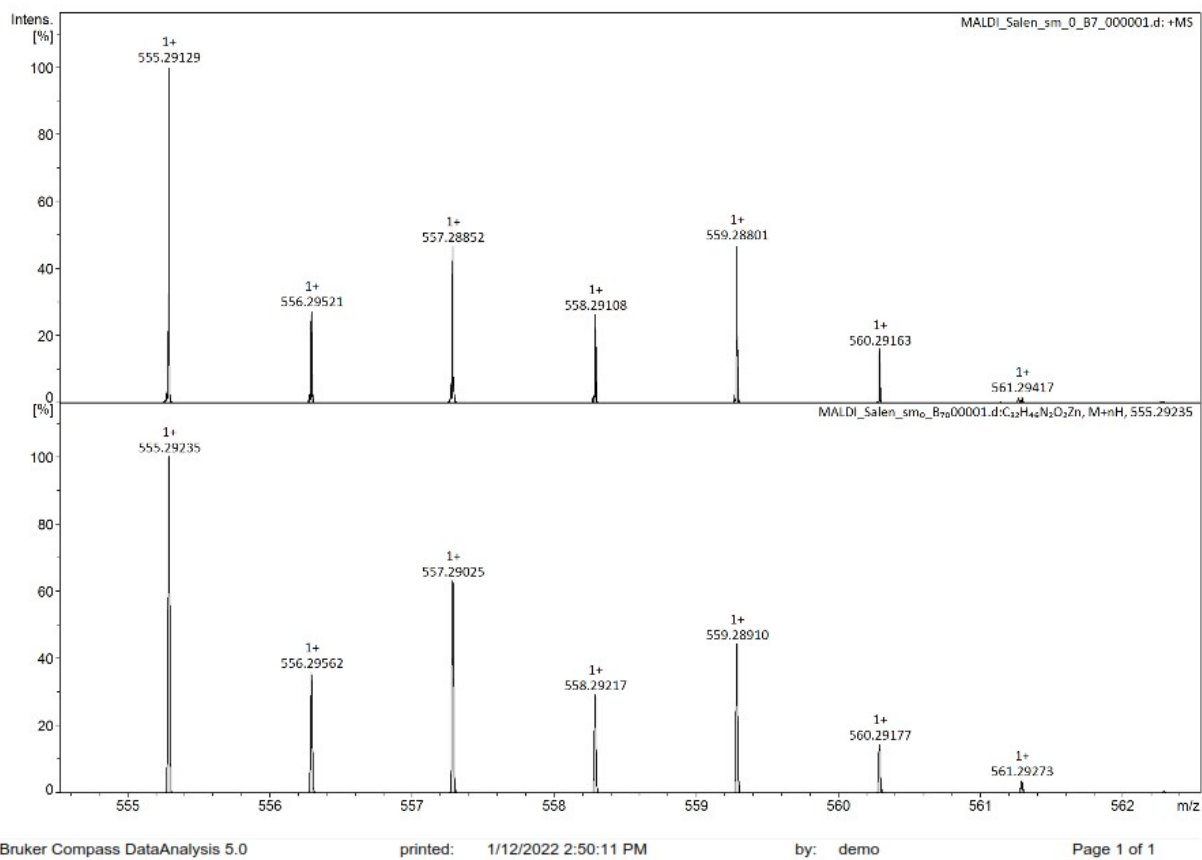

**Figure S1.** Enlargement of the MALDI spectrum of complex **1** in MeOH. The upper trace is the experimental trace whereas the lower is the theoretical one.

### Generic Display Report (all)

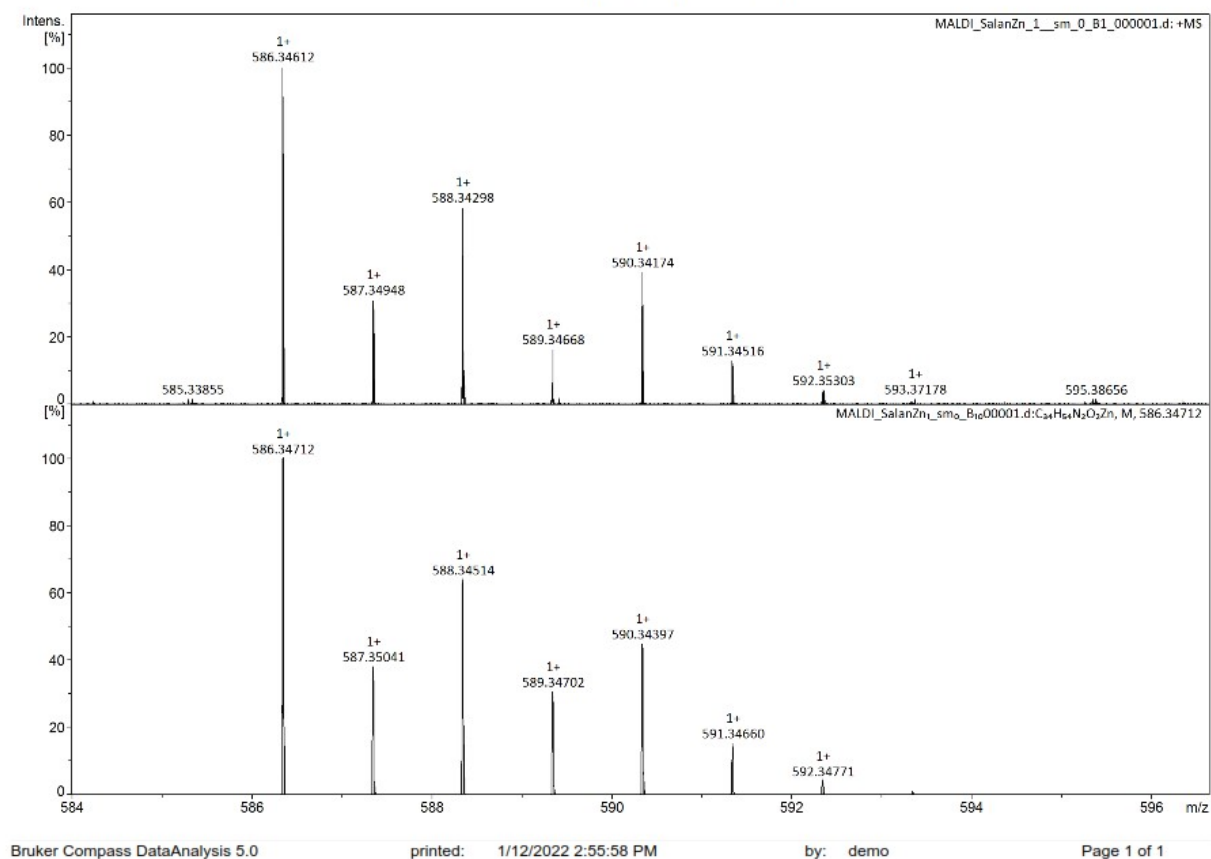

**Figure S2.** Enlargement of the MALDI spectrum of complex **2** in MeOH. The upper trace is the experimental trace whereas the lower is the theoretical one.

### Generic Display Report (all)

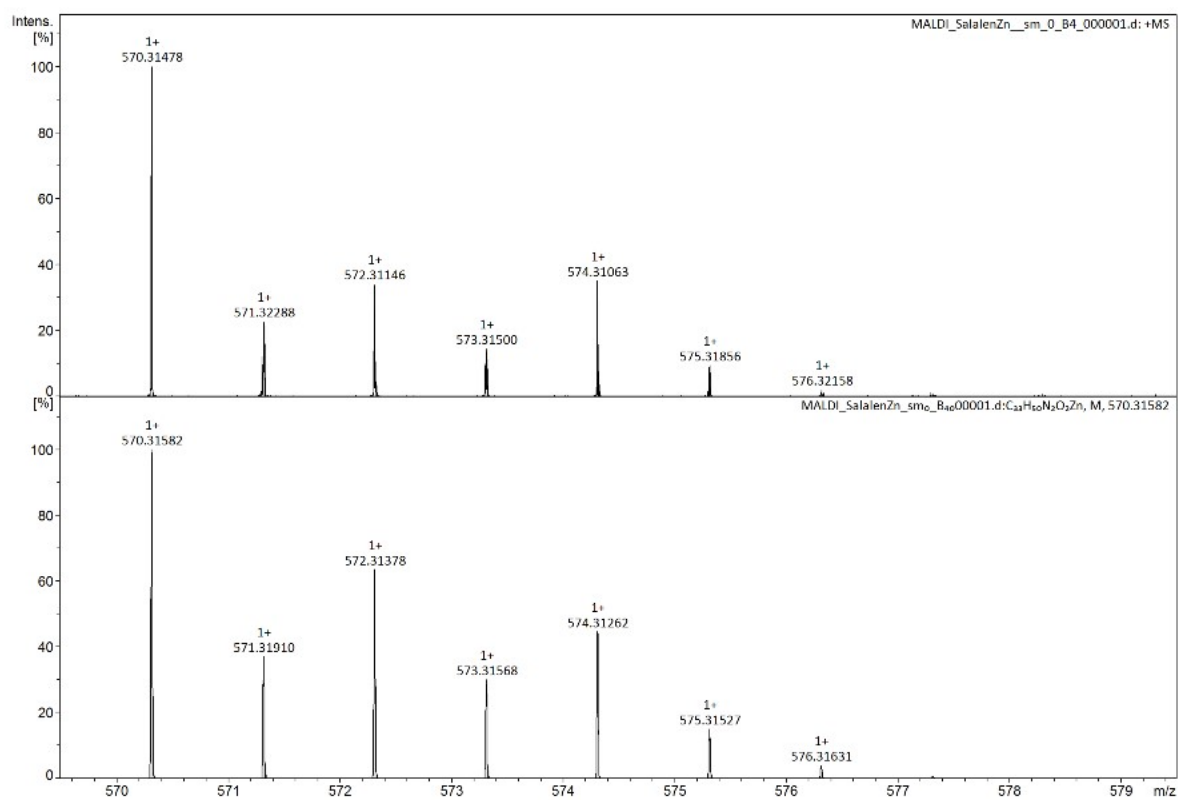

**Figure S3.** Enlargement of the MALDI spectrum of complex **3** in MeOH

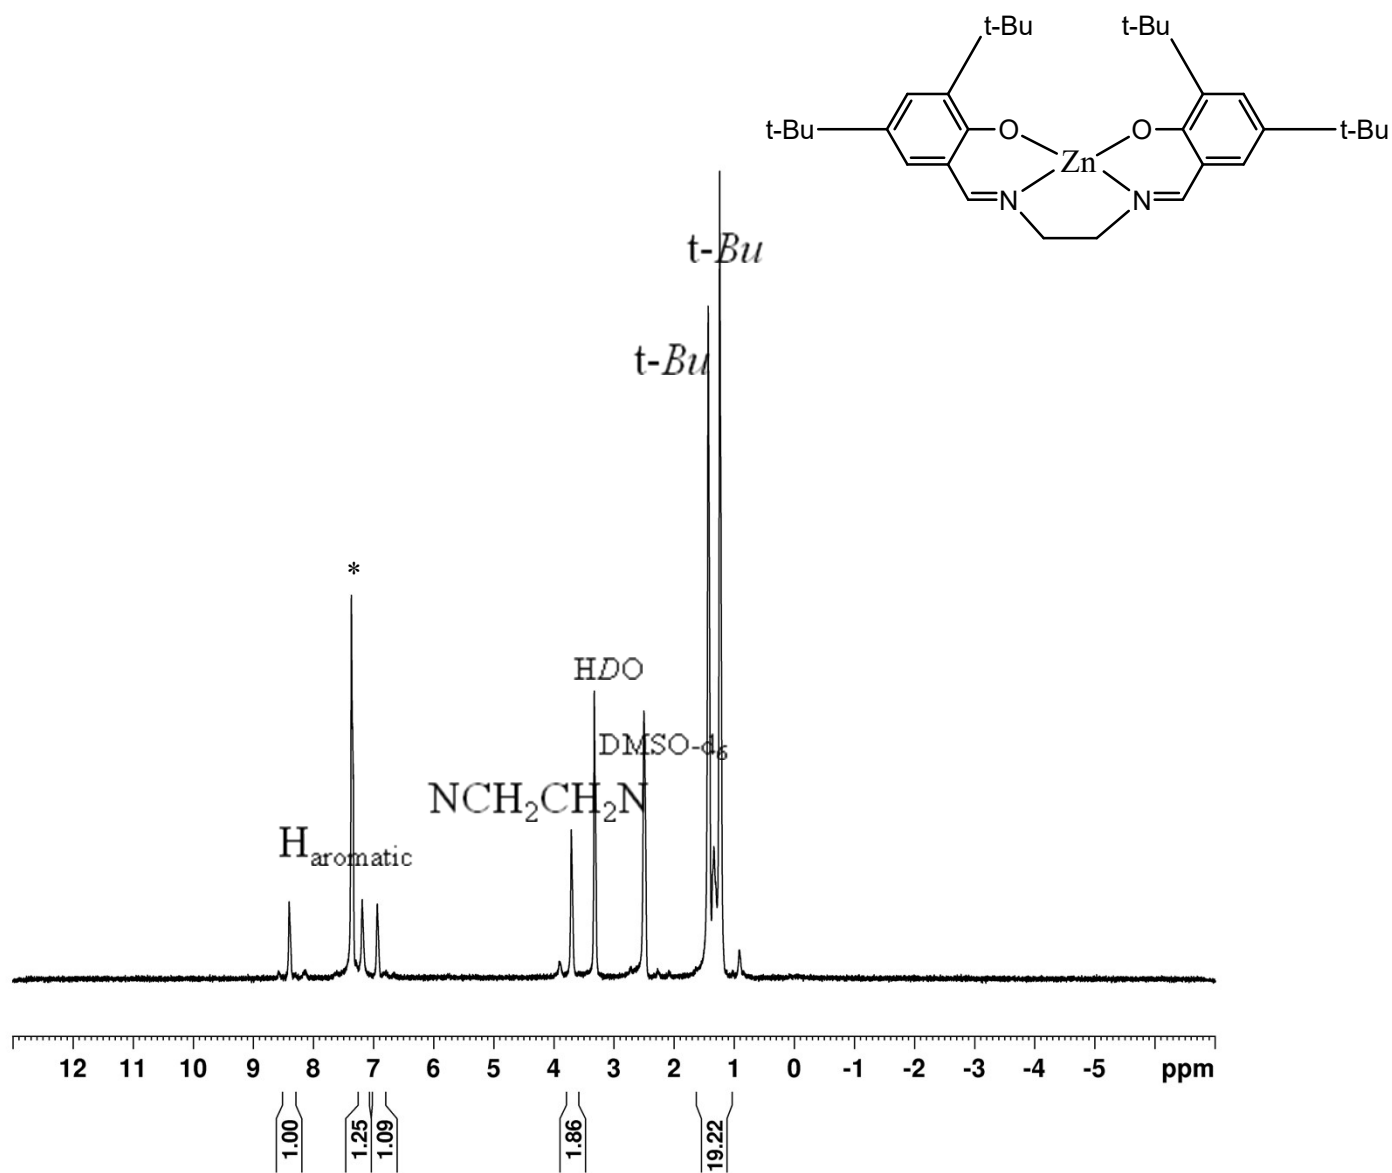

**Figure S4.**  $^1\text{H}$  NMR spectrum of complex **1** in  $\text{DMSO-d}_6$ .  $[\text{complex } \mathbf{1}] = 5 \times 10^{-3} \text{ M}$ .  $*$  = benzene used for the synthesis.

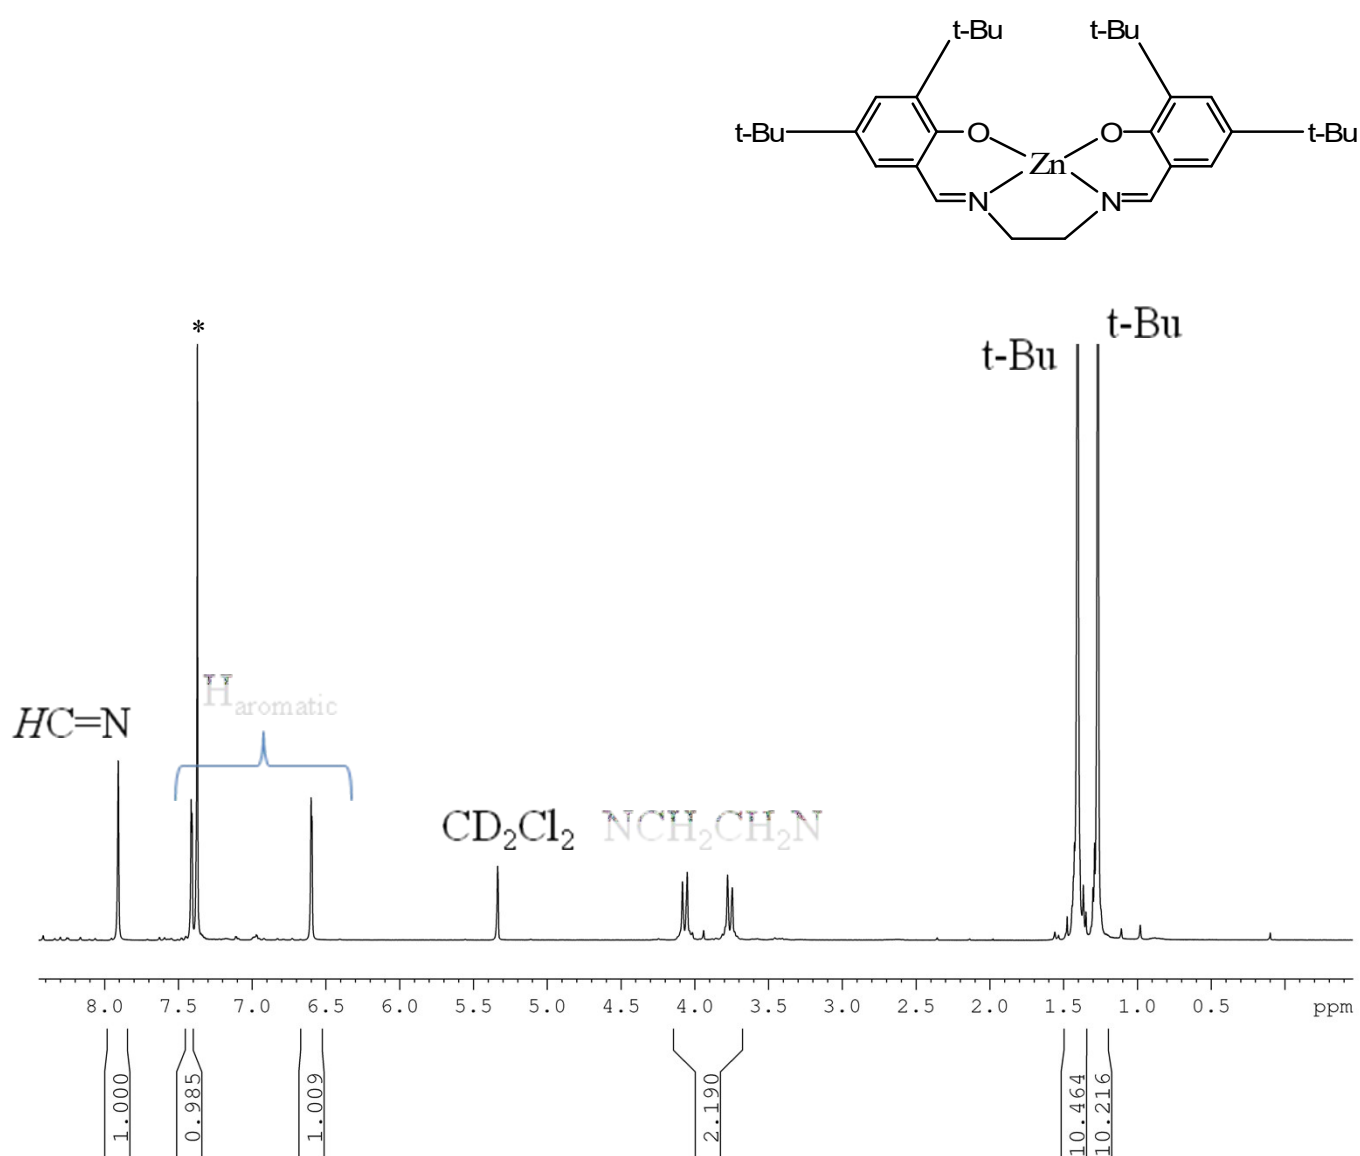

**Figure S5.**  $^1\text{H}$  NMR spectrum of complex **1** in  $\text{CD}_2\text{Cl}_2$ .  $[\text{complex } \mathbf{1}] = 5 \times 10^{-3} \text{ M}$ . \* = benzene used for the synthesis.



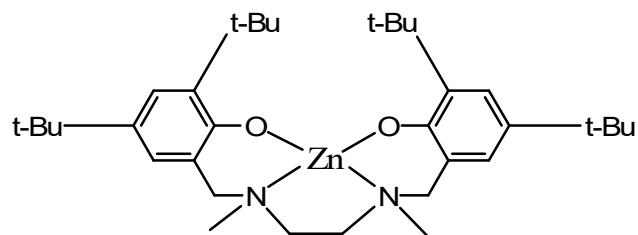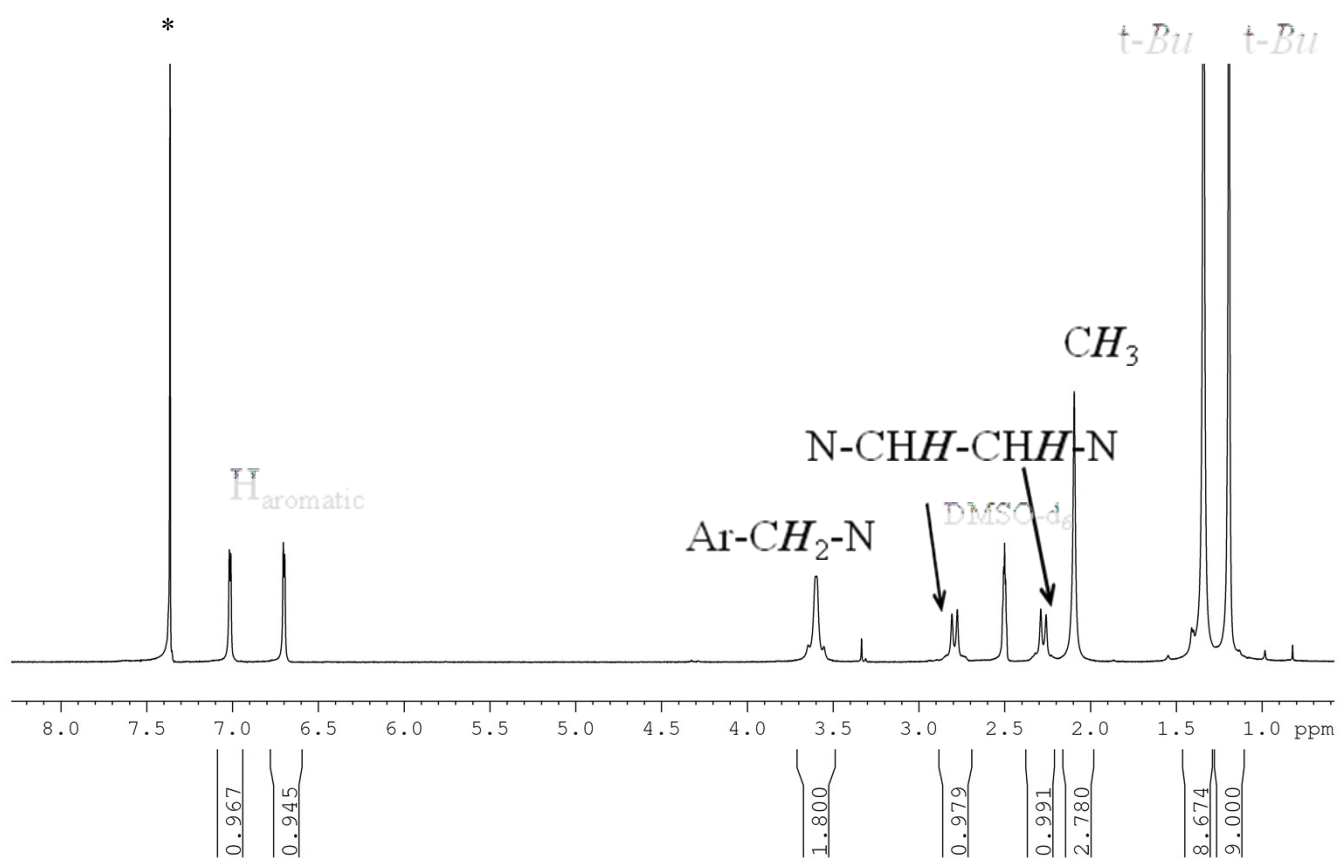

**Figure S6.**  $^1\text{H}$  NMR spectrum of complex 2 in  $\text{DMSO-d}_6$ .  $[\text{complex 2}] = 5 \times 10^{-3} \text{ M}$ . \* = benzene used for the synthesis.

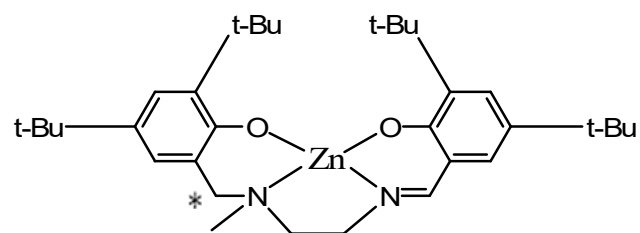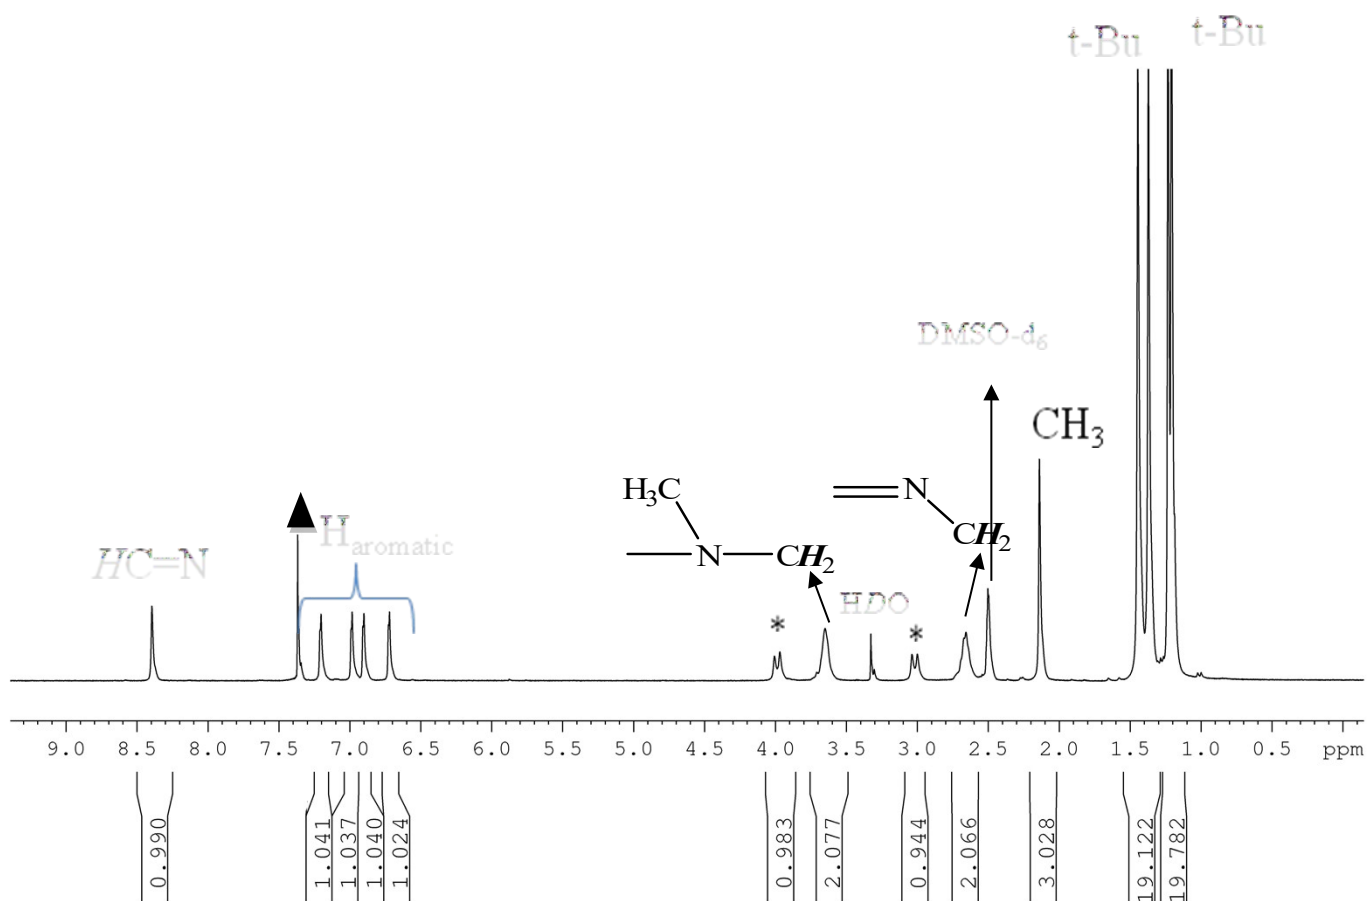

**Figure S7.** <sup>1</sup>H NMR spectrum of complex **3** in DMSO-d<sub>6</sub>. [complex **3**] = 5 × 10<sup>-3</sup> M. ▲ = benzene used for the synthesis.

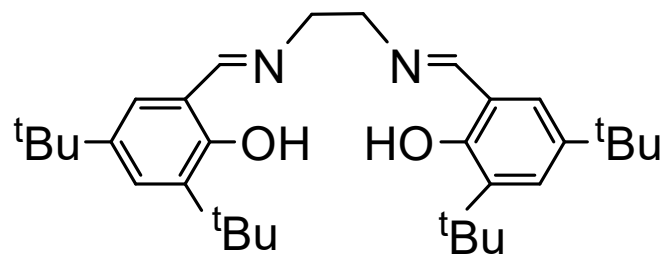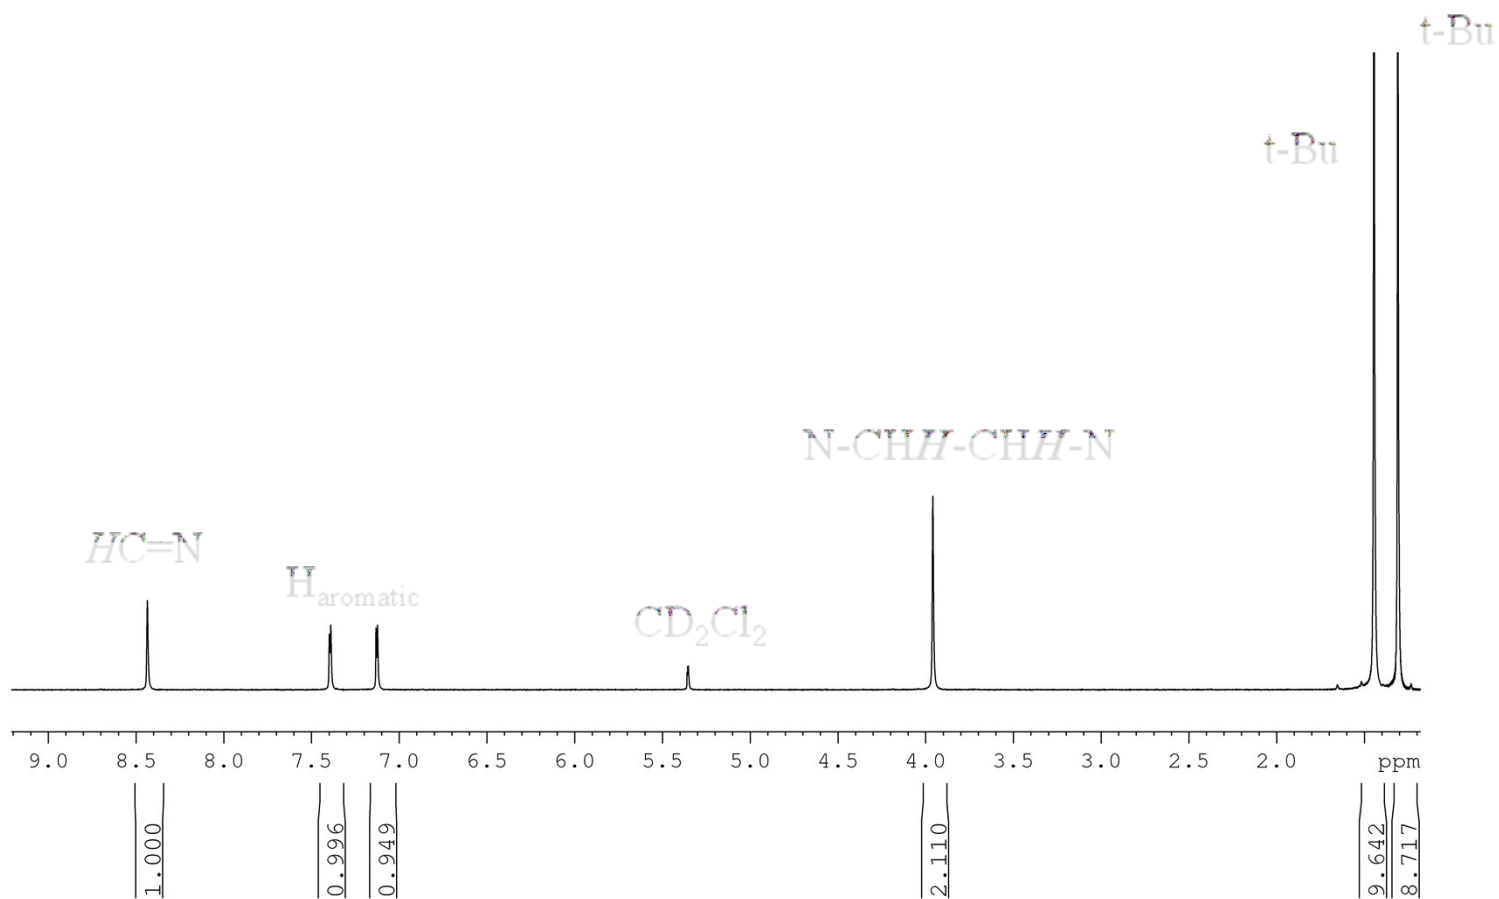

**Figure S8.**  $^1\text{H}$  NMR spectrum of ligand **1** in  $\text{CD}_2\text{Cl}_2$ .  $[\text{ligand } \mathbf{1}] = 5 \times 10^{-3} \text{ M}$ .

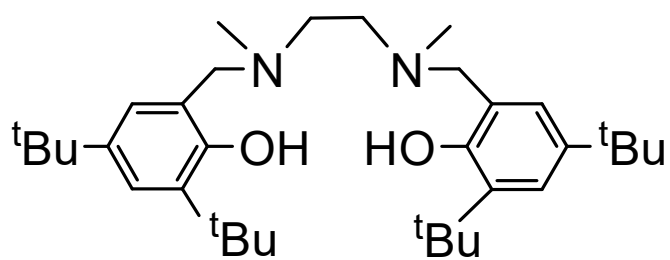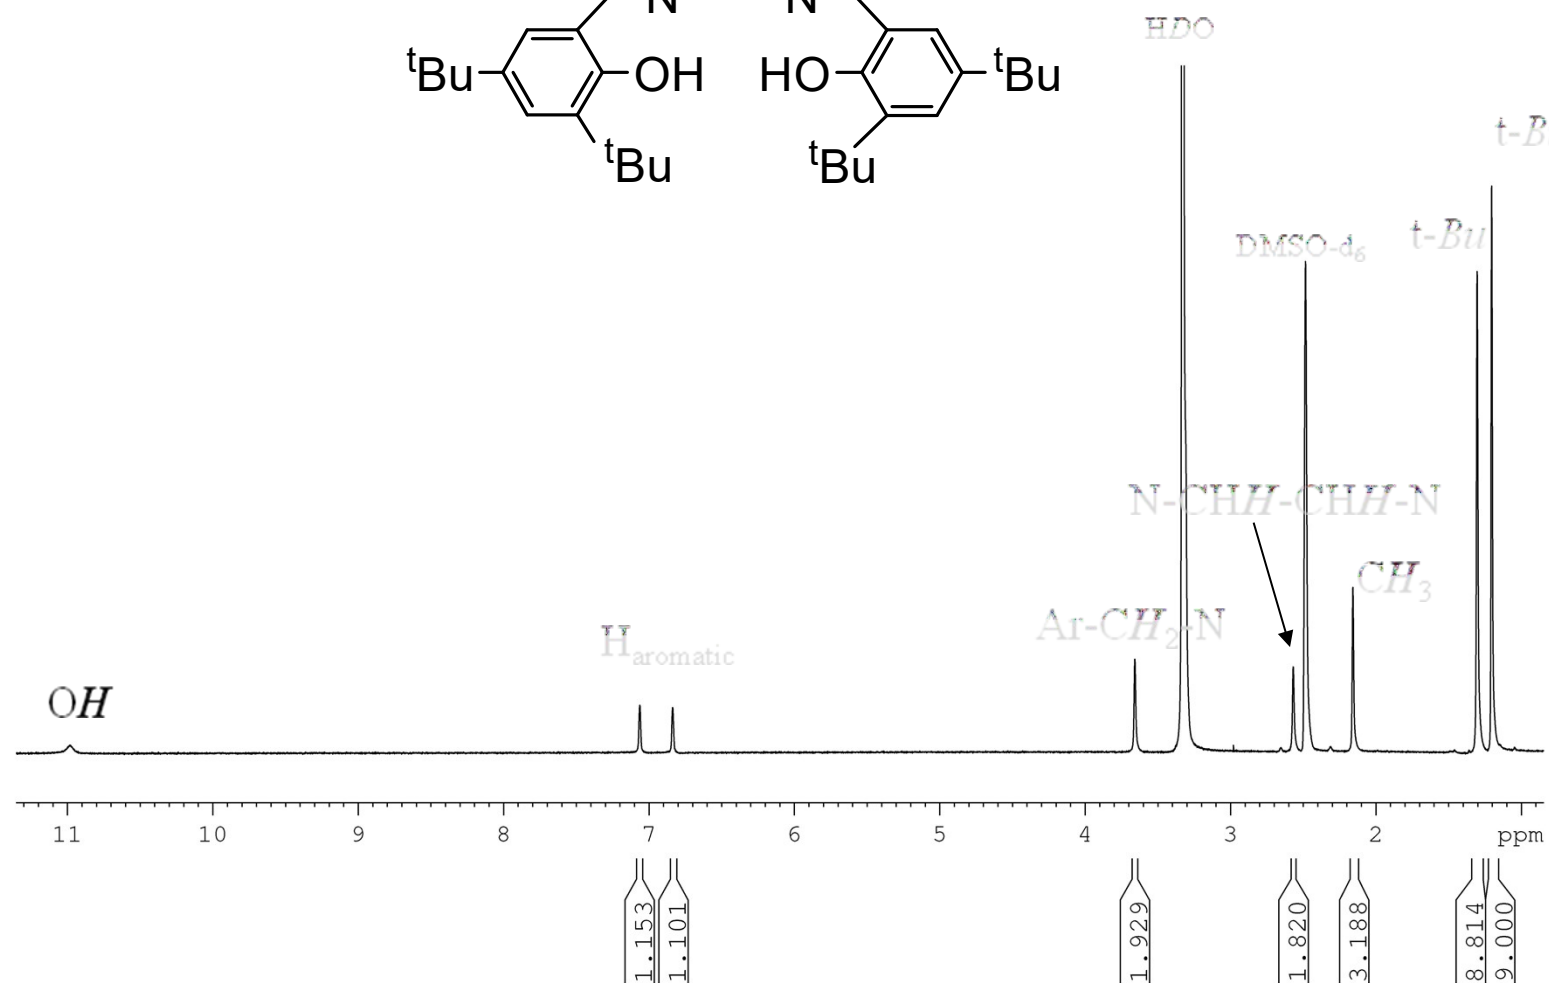

**Figure S9.**  $^1\text{H}$  NMR spectrum of ligand **2** in  $\text{DMSO-d}_6$ .  $[\text{ligand } \mathbf{2}] = 5 \times 10^{-3} \text{ M}$ .

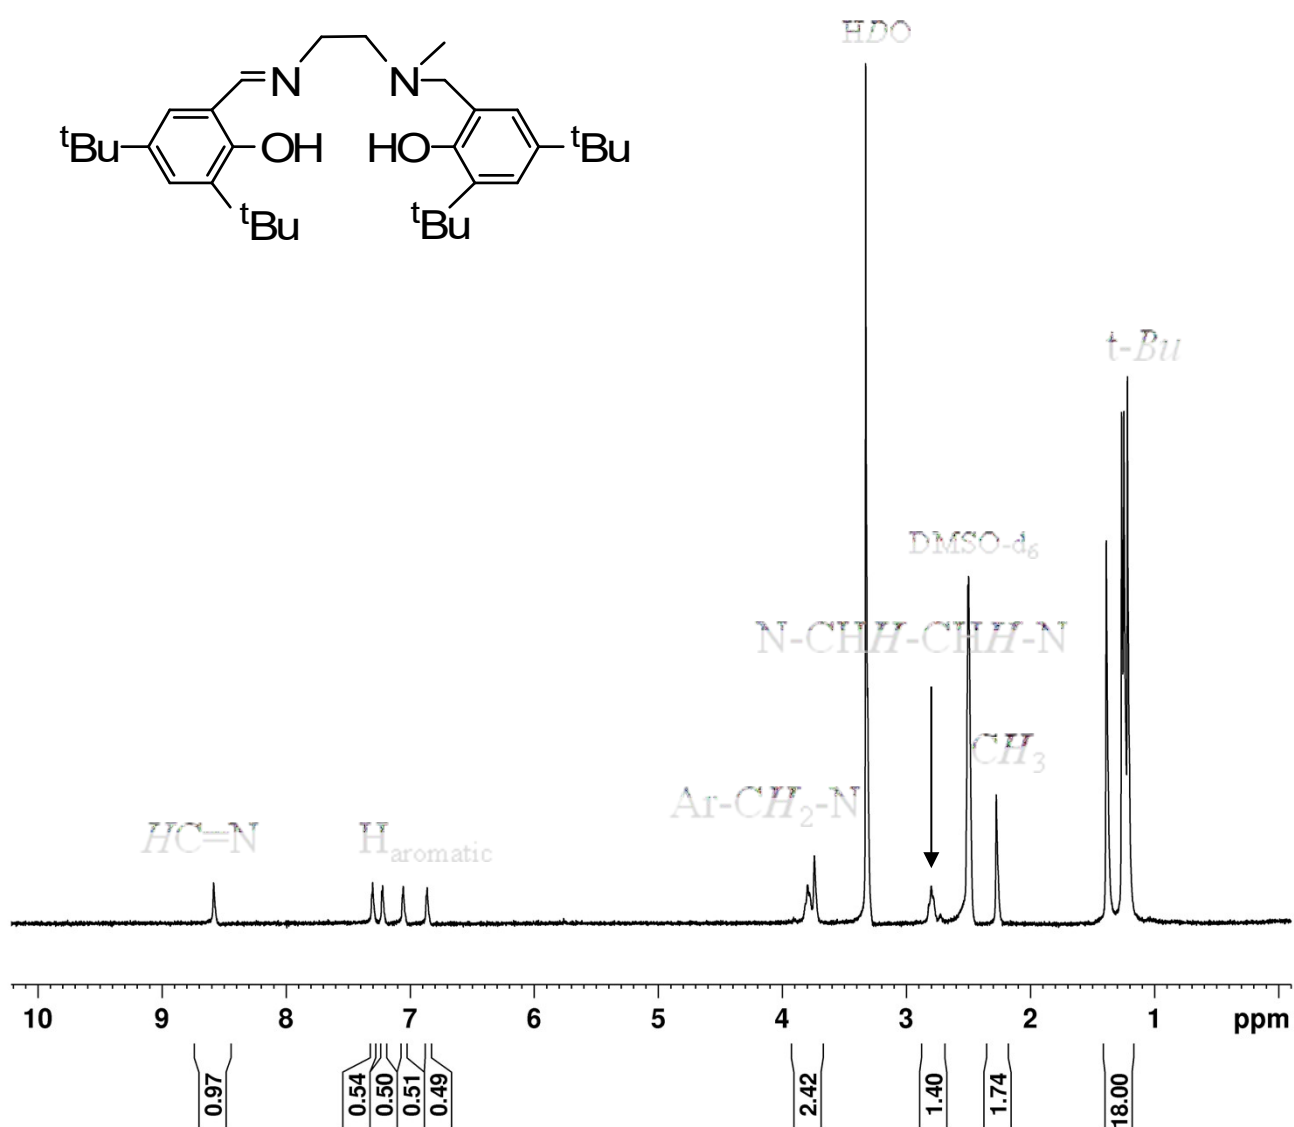

**Figure S10.**  $^1\text{H}$  NMR spectrum of ligand **3** in DMSO- $d_6$ .  $[\text{ligand } \mathbf{3}] = 5 \times 10^{-3} \text{ M}$ .

## Generic Display Report (all)

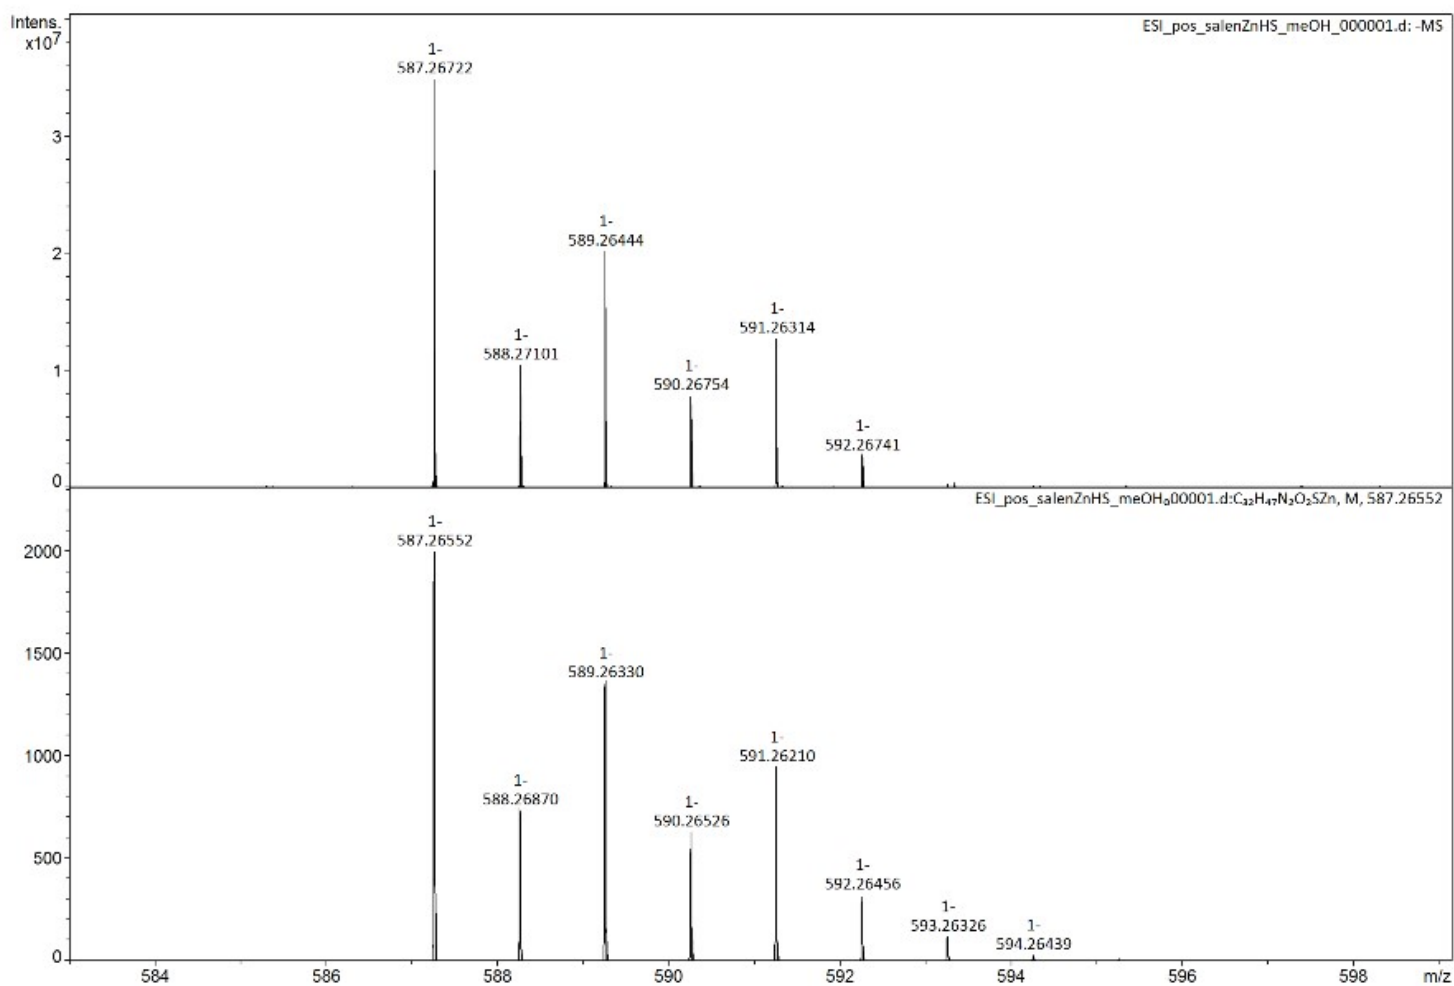

**Figure S11.** Enlargement of the MALDI spectrum of complex **1** in the presence of NaHS in THF. The upper trace is the experimental trace whereas the lower is the theoretical one.

## Generic Display Report (all)

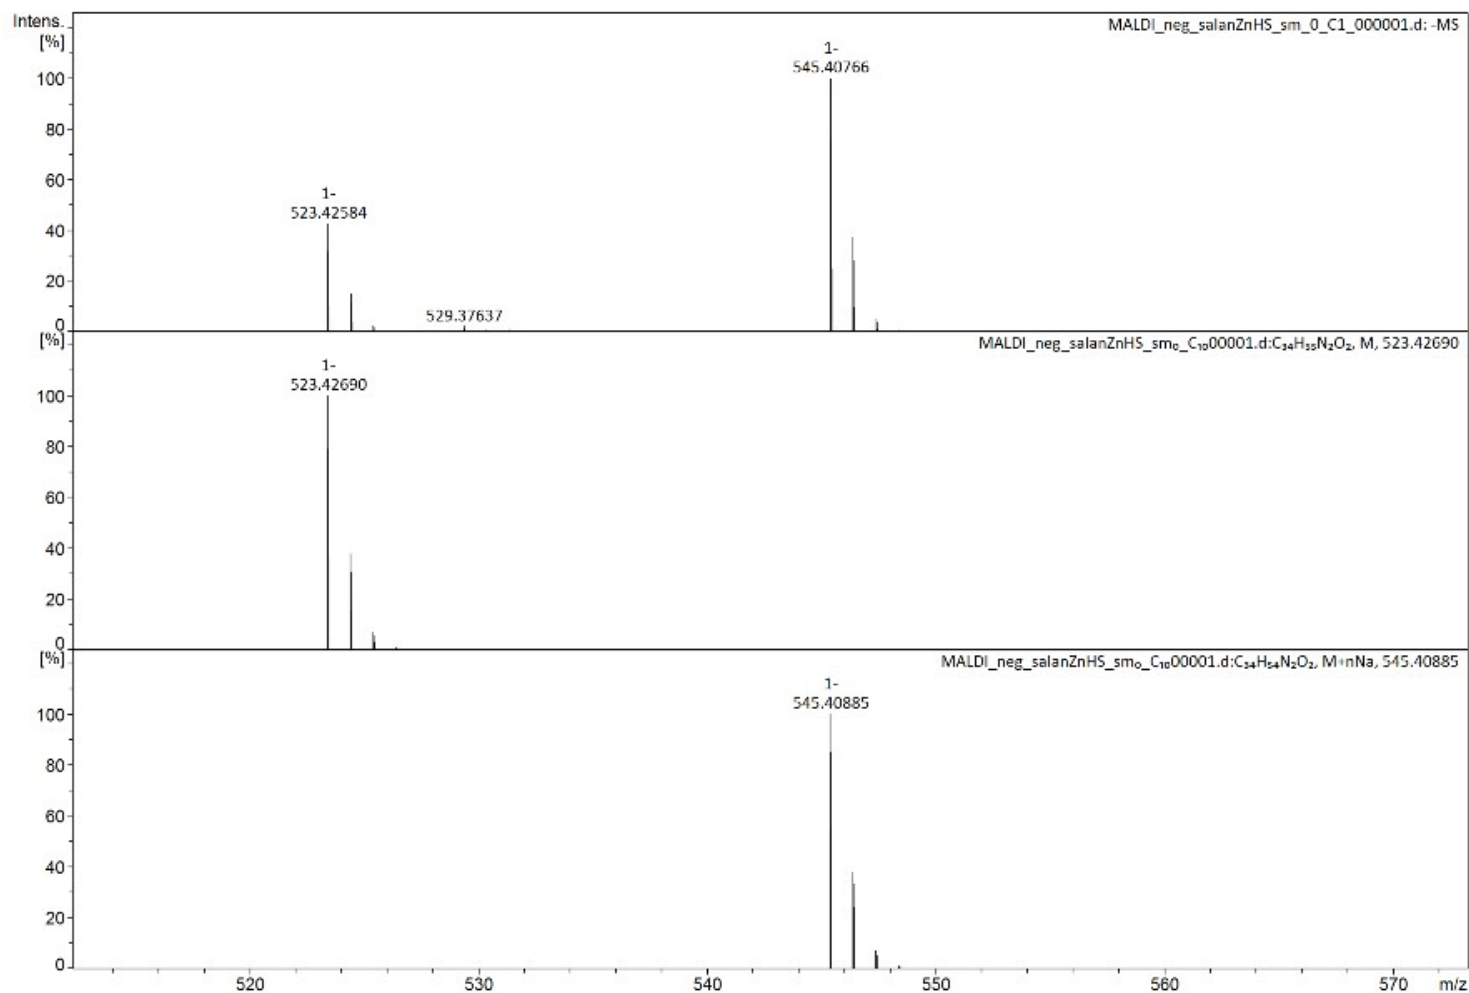

**Figure S12.** Enlargement of the MALDI spectrum of complex **2** in the presence of NaHS in MeOH. The upper trace is the experimental trace whereas the lower ones are the theoretical ones.

## Generic Display Report (all)

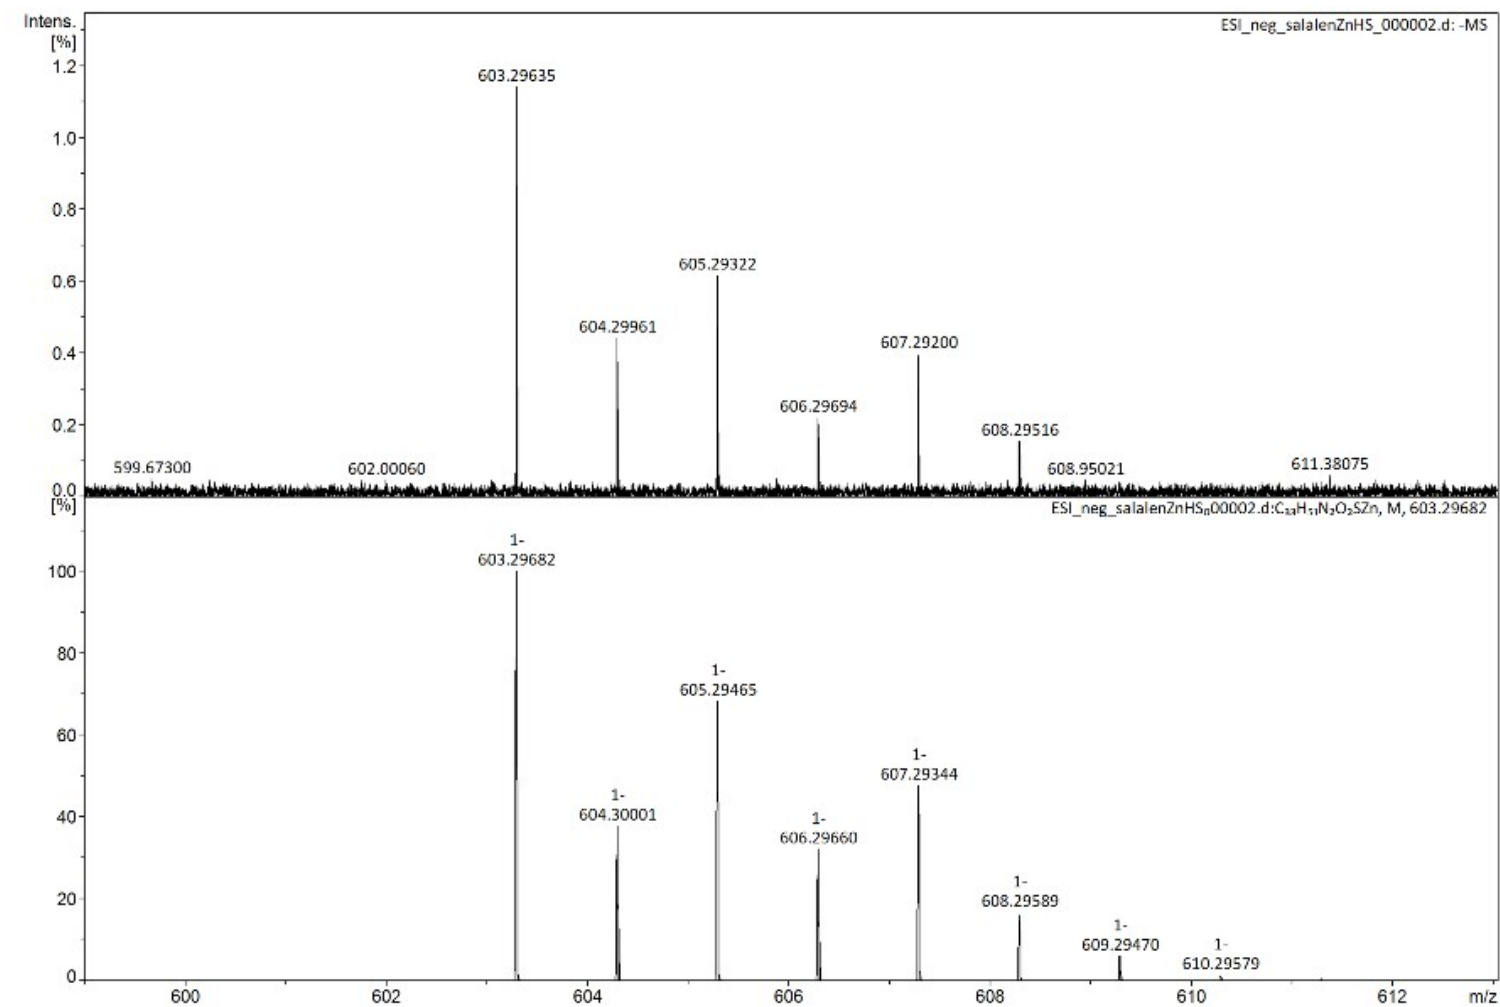

Bruker Compass DataAnalysis 5.0

printed: 1/17/2022 2:04:48 PM

by: demo

Page 1 of 1

**Figure S13.** Enlargement of the MALDI spectrum of complex **3** in the presence of NaHS in MeOH. The upper trace is the experimental trace whereas the lower is the theoretical one.



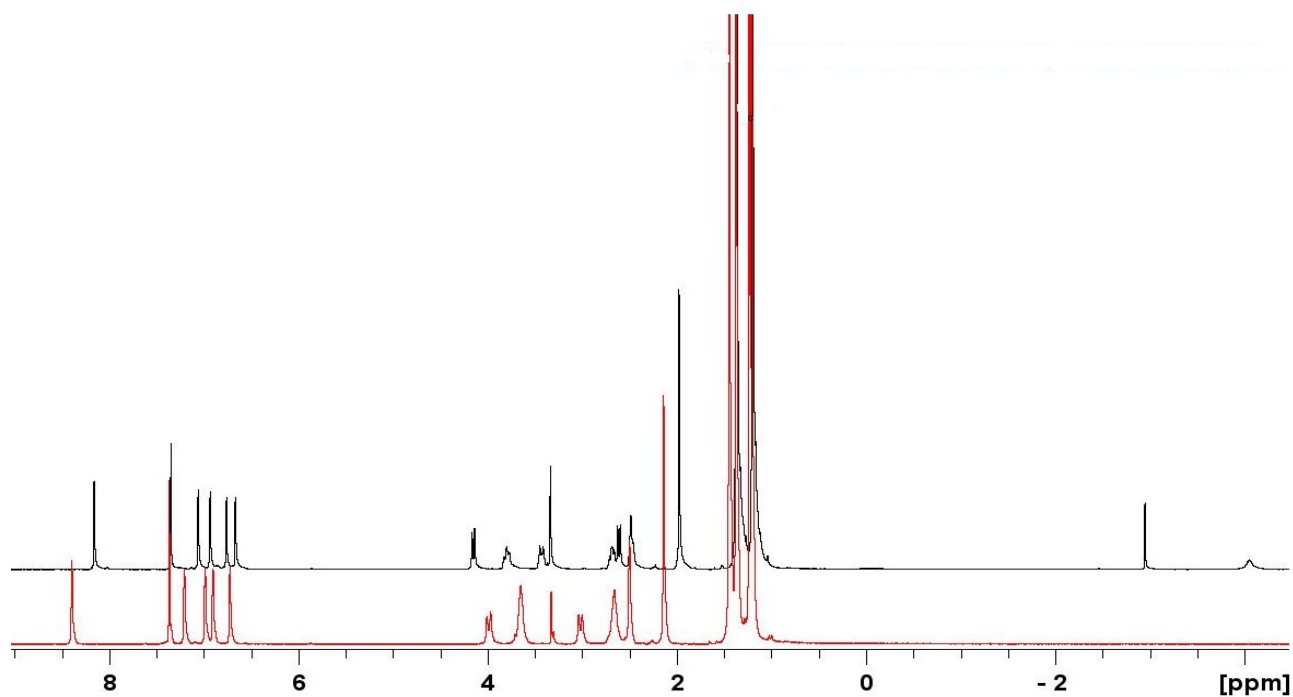

**Figure S14.** <sup>1</sup>H NMR spectrum of complex **3** in DMSO-d<sub>6</sub> (red trace), <sup>1</sup>H NMR spectrum of complex **3** in DMSO-d<sub>6</sub> after the addition of an excess of HS<sup>-</sup> (black trace). [complex **3**] = 5 × 10<sup>-3</sup> M; [NaSH] = 0.01 M.

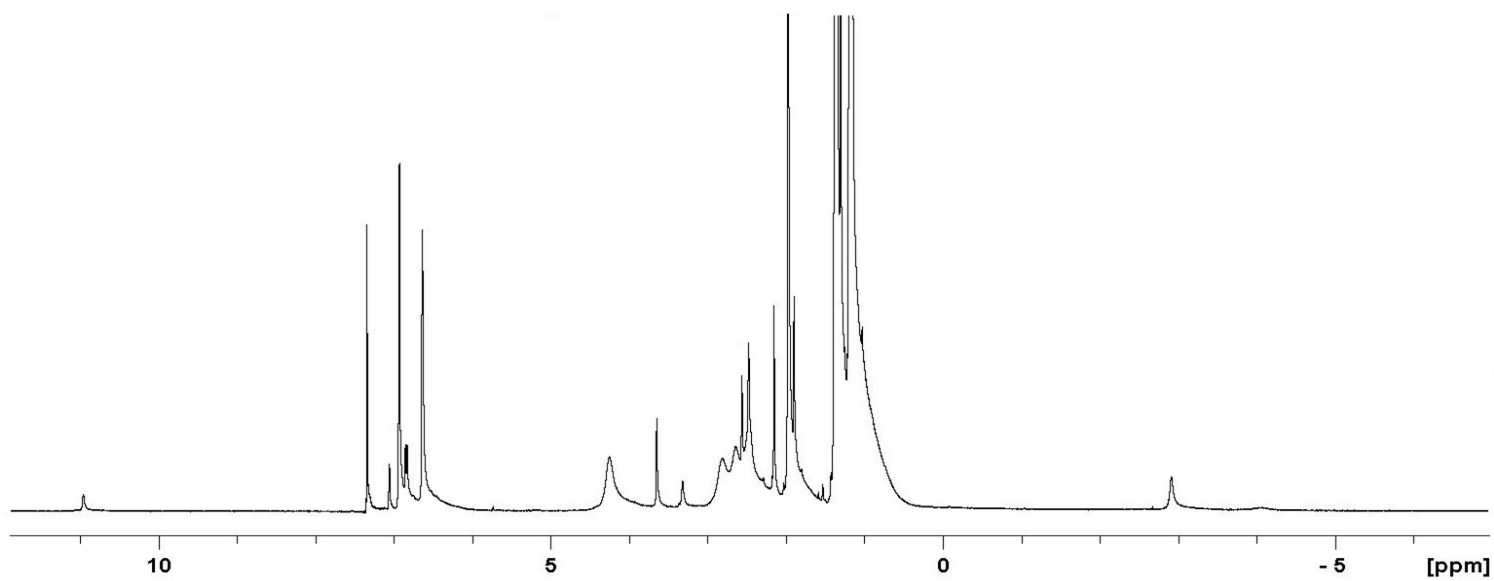

**Figure S15.** <sup>1</sup>H NMR spectrum of complex **2** in DMSO-d<sub>6</sub> after the addition of an excess of HS<sup>-</sup>.  
[complex **1**] = 5 × 10<sup>-3</sup> M; [NaSH] = 0.01 M.

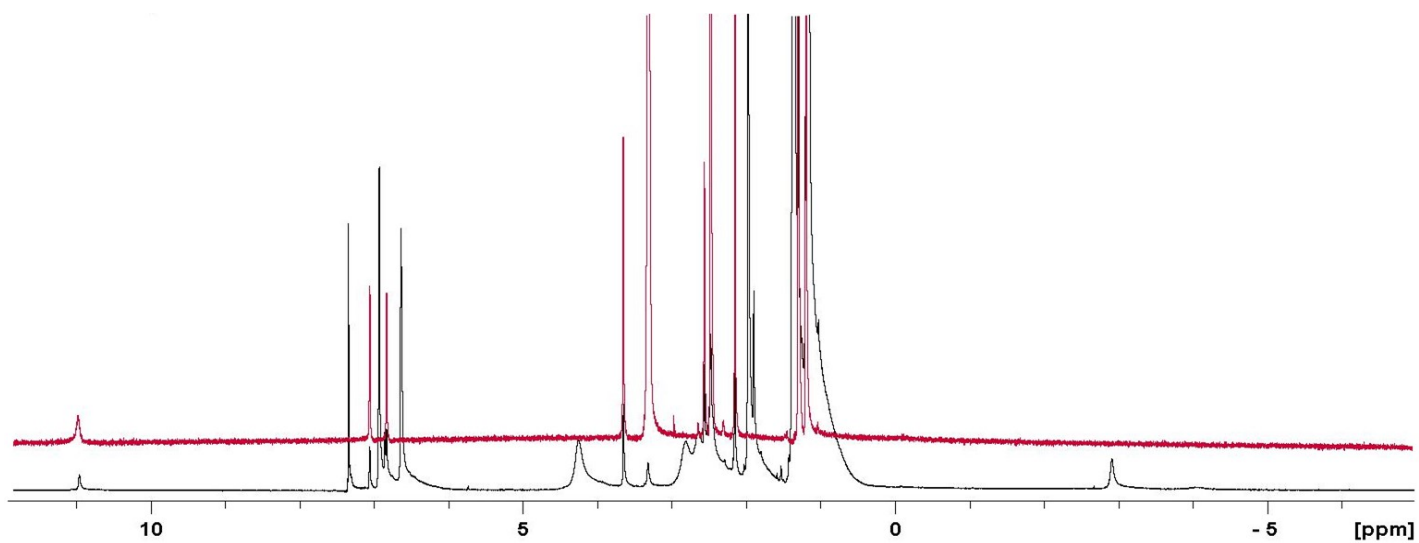

**Figure S16.** <sup>1</sup>H NMR spectrum of complex **2** in DMSO-d<sub>6</sub> after the addition of an excess of HS<sup>-</sup> (black trace), <sup>1</sup>H NMR spectrum of ligand **2** in DMSO-d<sub>6</sub> (red trace). [complex **1**] = 5 × 10<sup>-3</sup> M; [NaSH] = 0.01 M.

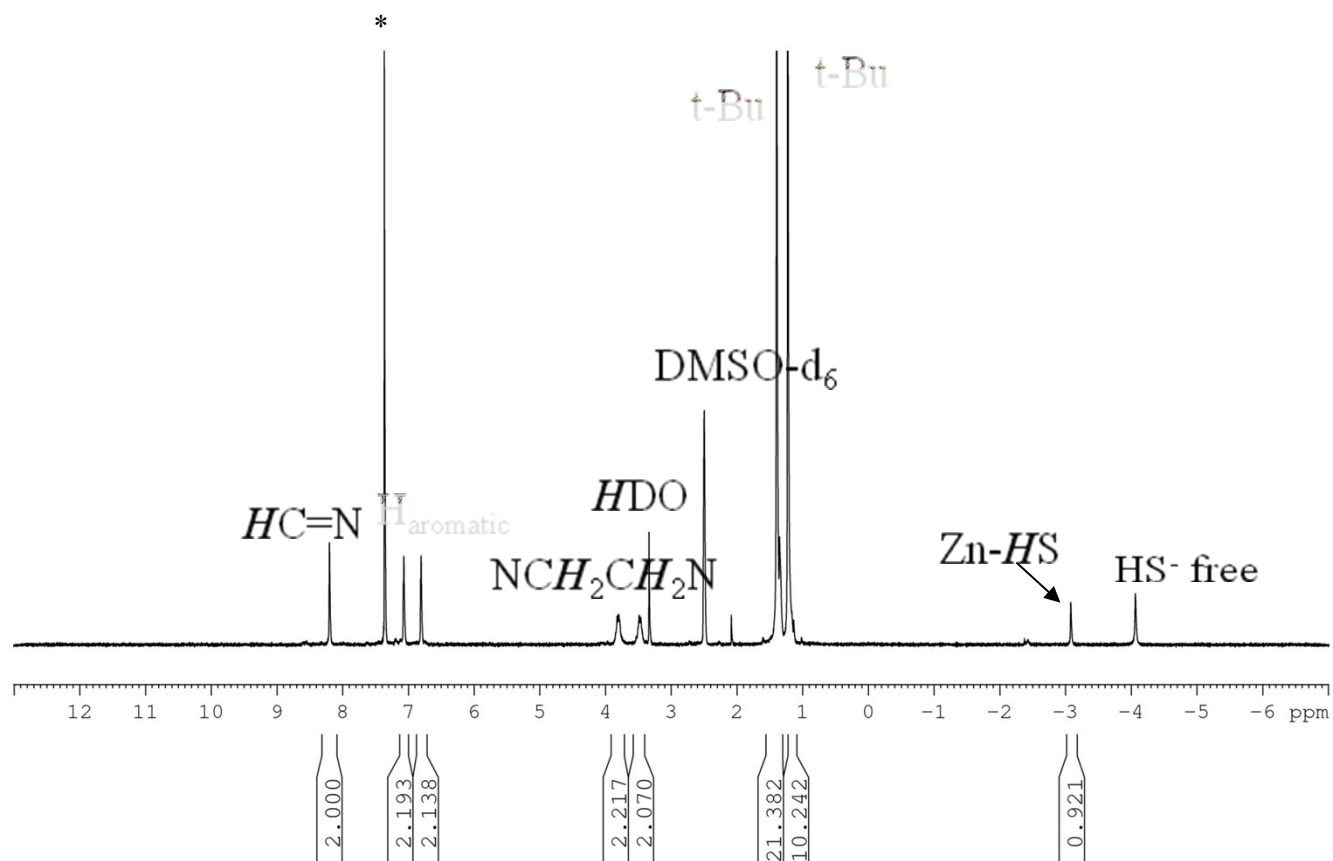

**Figure S17.**  $^1\text{H}$  NMR spectrum of complex **1** in  $\text{DMSO-d}_6$  after the addition of an excess of  $\text{HS}^-$ .  $[\text{complex } \mathbf{1}] = 5 \times 10^{-3} \text{ M}$ ;  $[\text{NaSH}] = 0.01 \text{ M}$ . \* = benzene used for the synthesis.

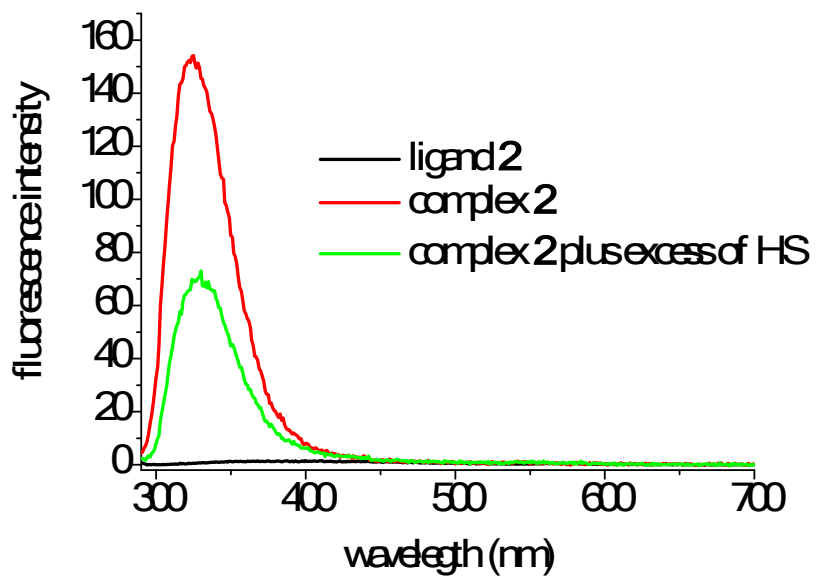

**Figure S18.** Emission spectra of ligand **2** and complex **2** in DMSO.  $\lambda_{\text{exc}} = 300 \text{ nm}$

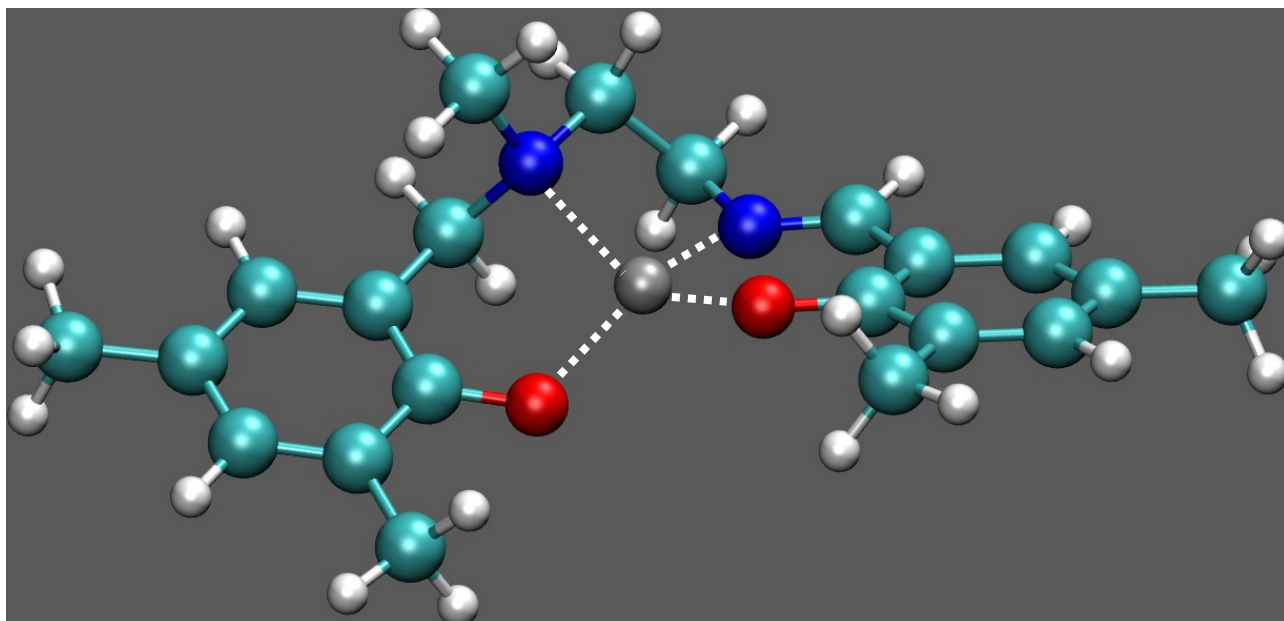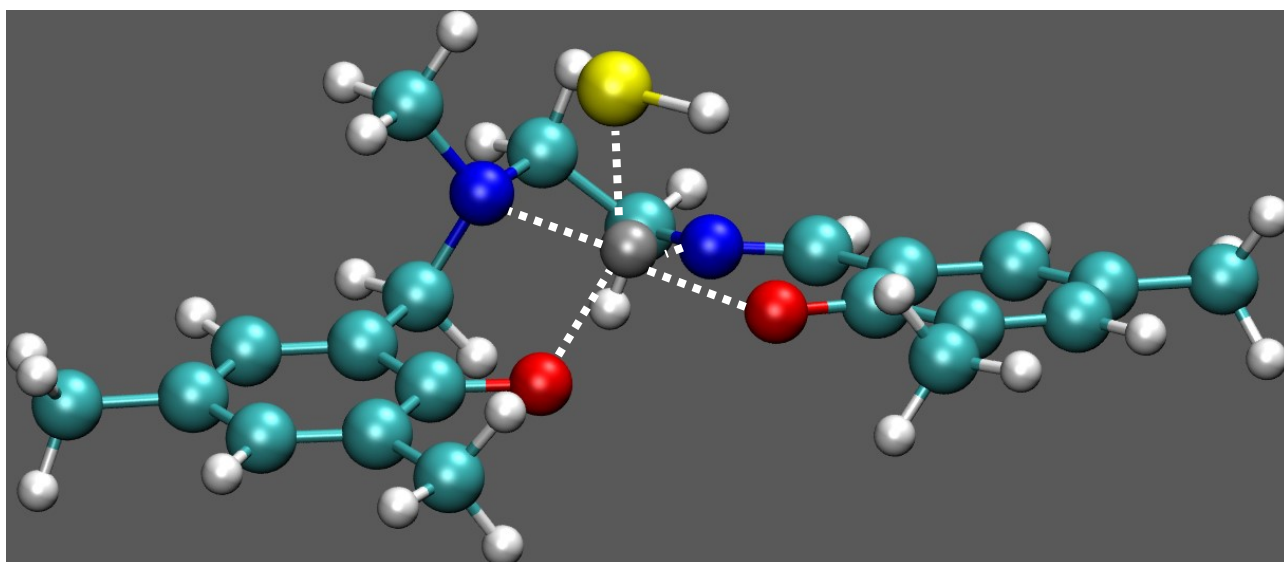

**Figure S19.** Optimized geometry for complex **3** (top) and its adduct with HS<sup>-</sup> (bottom).

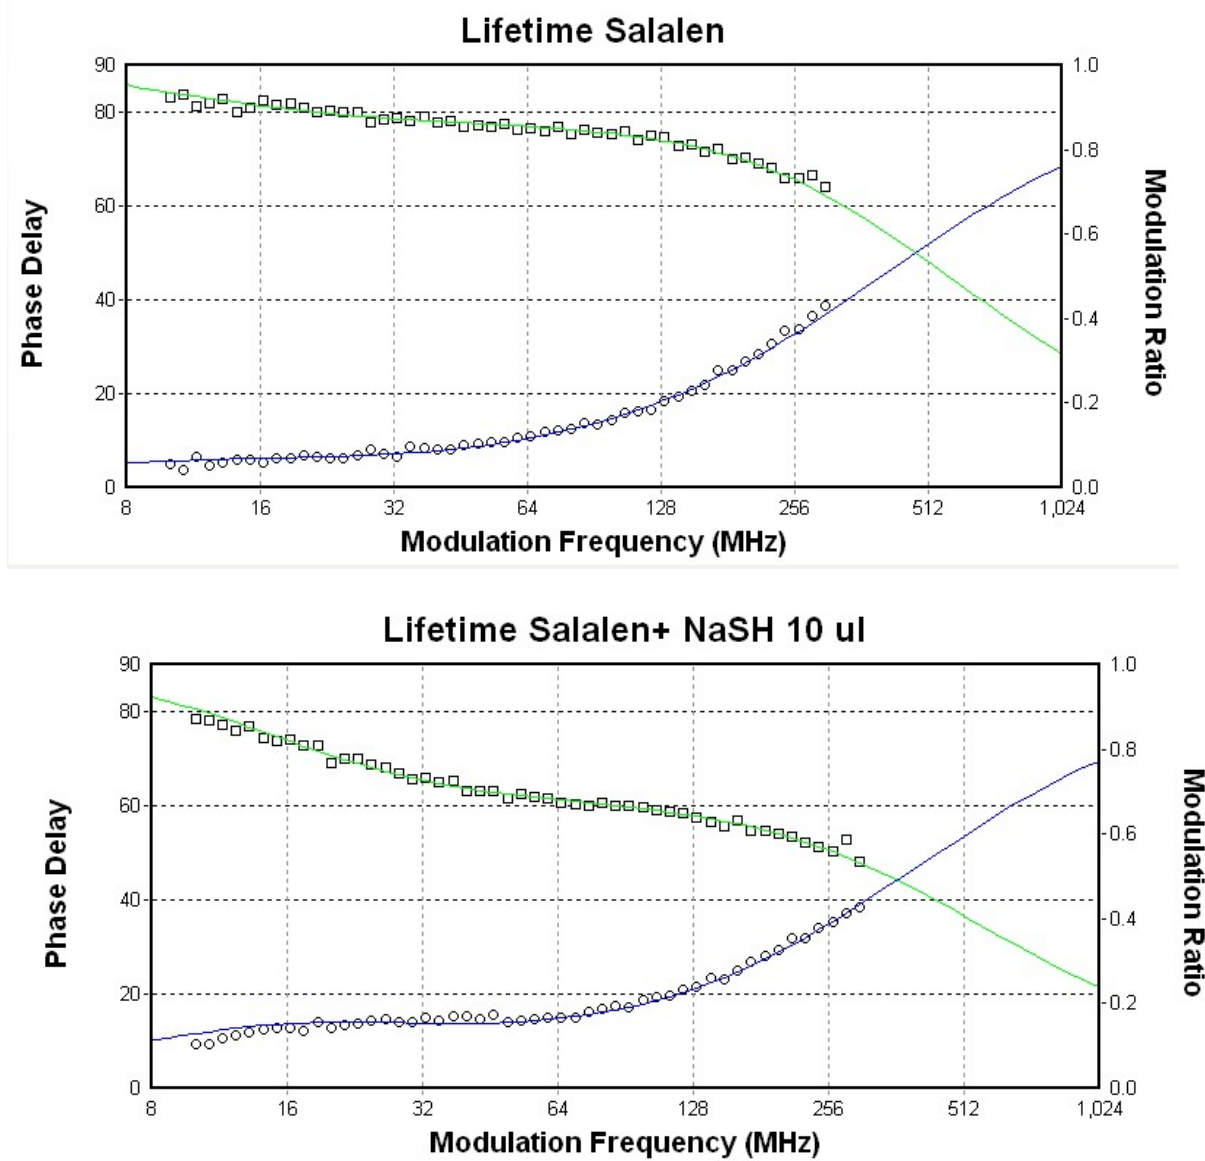

**Figure S20.** Frequency domain lifetime measurements of complex **3** in absence (A) and in the presence of an excess of NaSH (B).

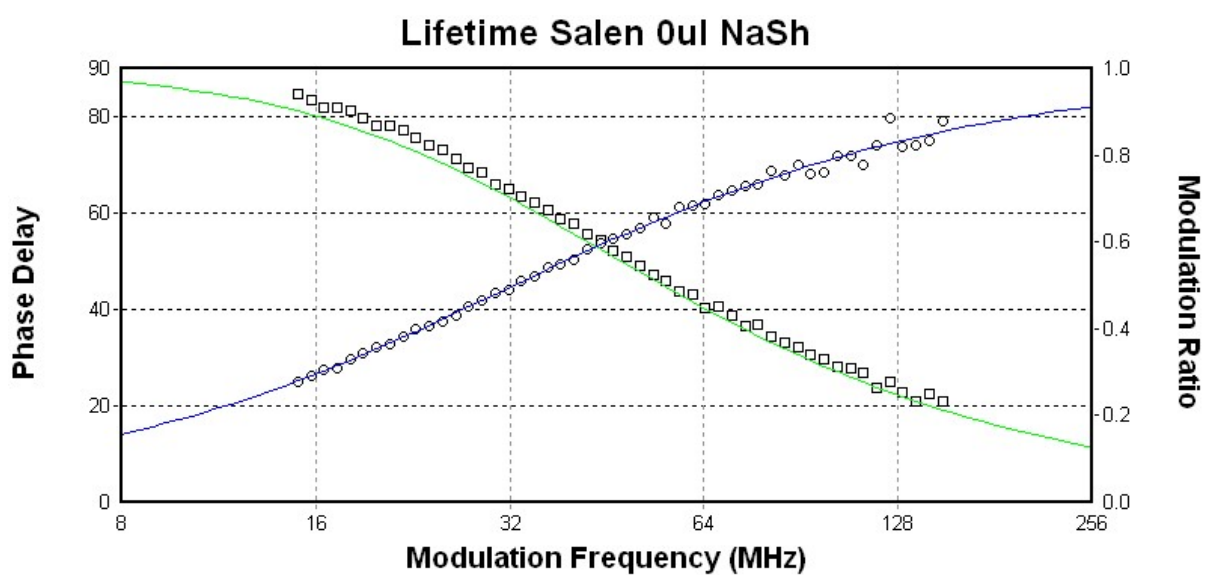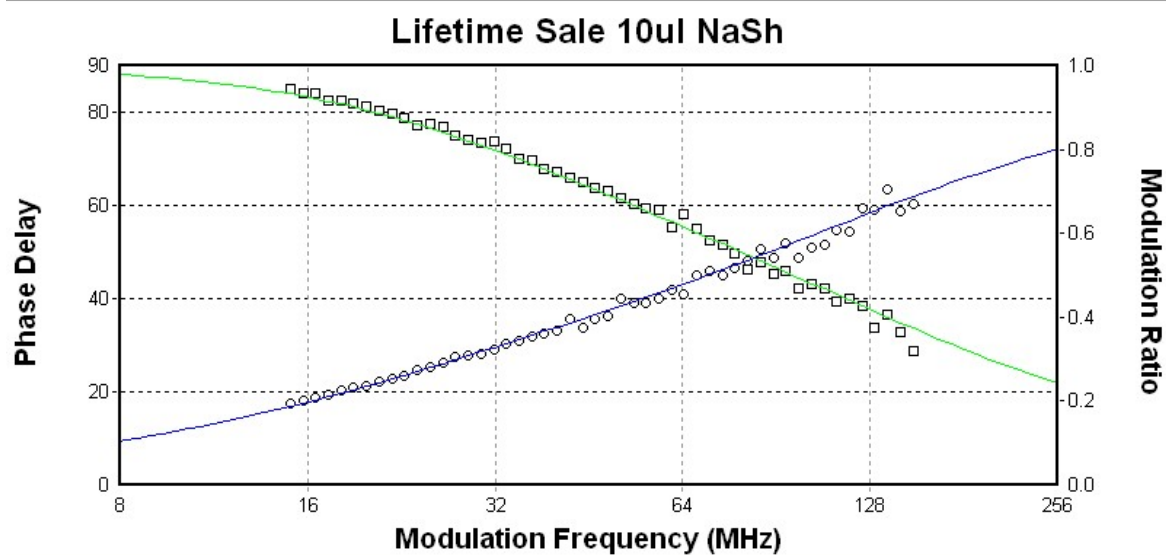

**Figure S21.** Frequency domain lifetime measurements of complex **1** in absence (A) and in the presence of excess of NaSH (B).



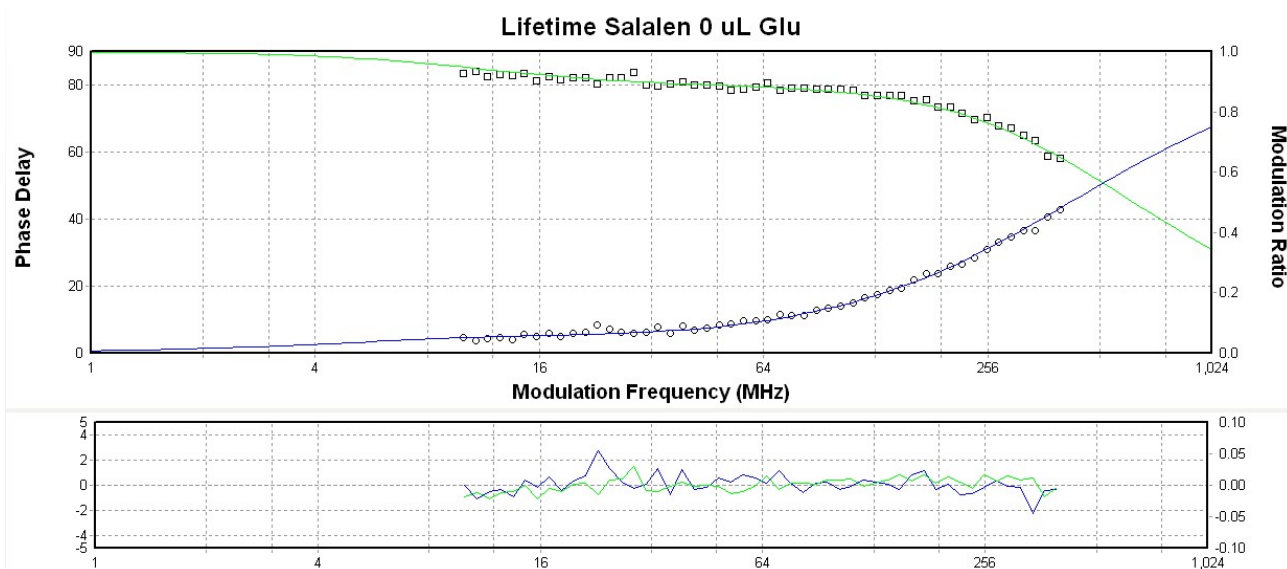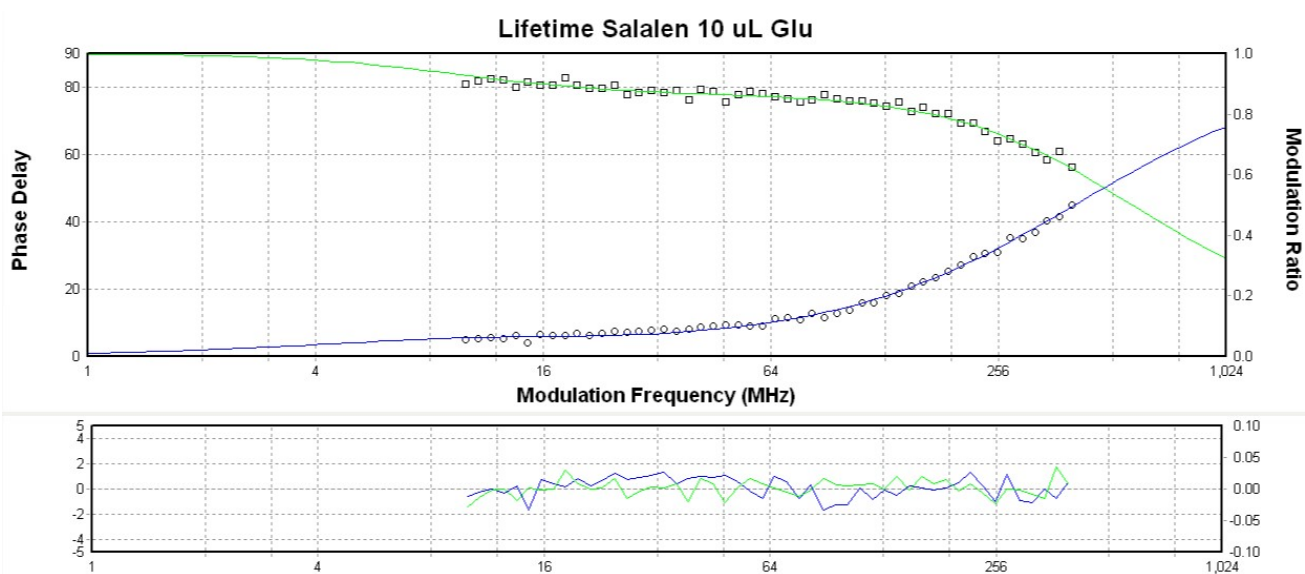

**Figure S22.** Frequency domain lifetime measurements of complex **3** in absence (A) and in the presence of an excess of GSH (B).

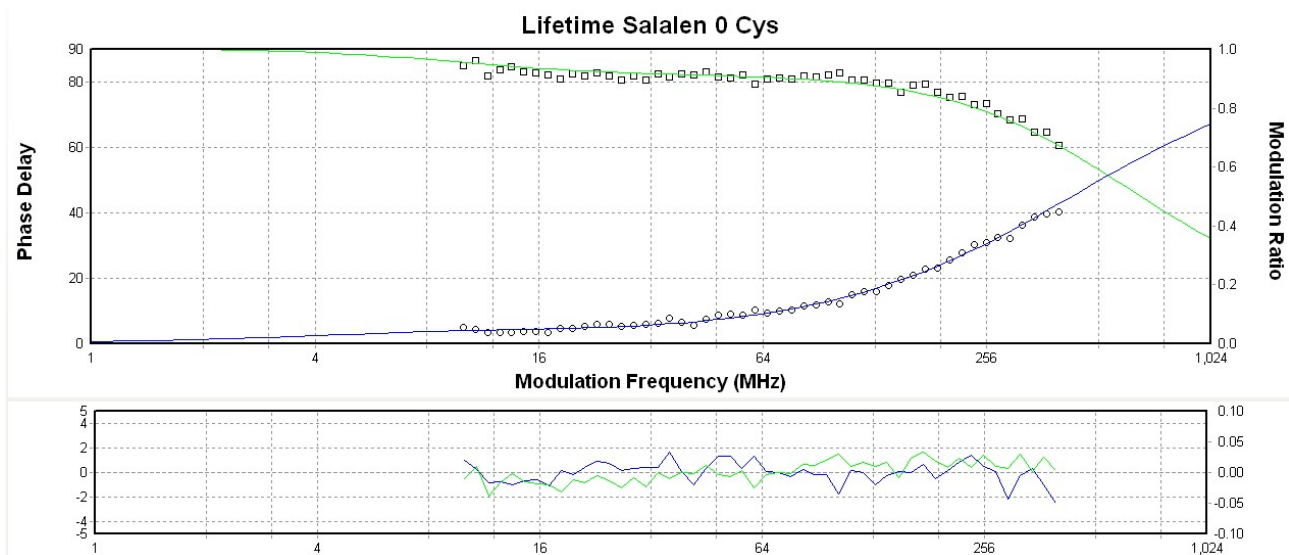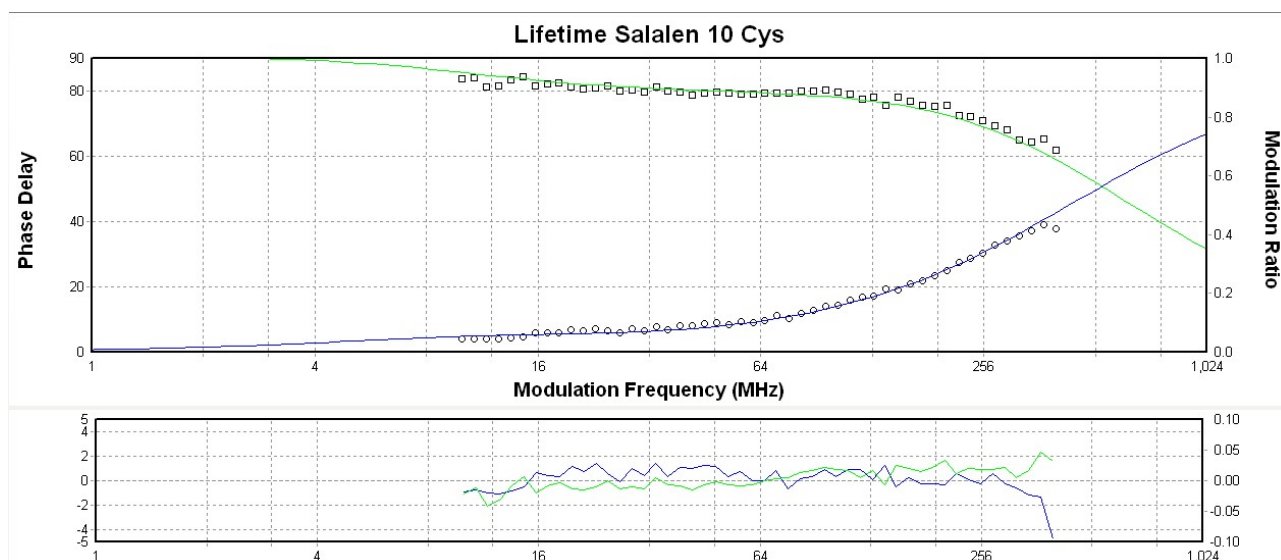

**Figure S23.** Frequency domain lifetime measurements of complex **3** in absence (A) and in the presence of an excess of L-Cys (B).

|                     | $\Phi_F$ | $A_{\max}$       | $F_{\max}$       |
|---------------------|----------|------------------|------------------|
| Complex <b>1</b>    | 0.4      | $A_{372} = 0,22$ | $F_{478} = 538$  |
| Complex <b>1_HS</b> | 0.09     | $A_{328} = 0,48$ | $F_{472} = 114$  |
| Complex <b>3</b>    | 0.06     | $A_{392} = 0,10$ | $F_{483} = 30,5$ |
| Complex <b>3_HS</b> | 0.13     | $A_{330} = 0,03$ | $F_{478} = 122$  |

**Table S1.** Photophysical features of complexes **1** and **3**.

| NaSH                | Average lifetime (ns) | Fit model                                                                                                                                                 | $\chi^2$ |
|---------------------|-----------------------|-----------------------------------------------------------------------------------------------------------------------------------------------------------|----------|
| 0 $\mu\text{g/ml}$  | 2,51                  | $f_1 = 0,8580$<br>$\tau_1 = 0,3934 \text{ ns}$<br>$\tau_2 = 15,32 \text{ ns}$<br>Bi-exponential discrete                                                  | 2,51     |
| 10 $\mu\text{g/ml}$ | 4.08                  | $f_1 = 0,7490$ $f_1 = 0,1720$<br>$\tau_1 = 0,4032 \text{ ns}$<br>$\tau_2 = 10,22 \text{ ns}$<br>$\tau_3 = 25,51 \text{ ns}$<br>Three-exponential discrete | 3,58     |

**Table S2.** Lifetime measurements for complex **3**

| NaSH                | Average lifetime (ns) | Fit model                                                                                | $\chi^2$ |
|---------------------|-----------------------|------------------------------------------------------------------------------------------|----------|
| 0 $\mu\text{g/ml}$  | 5,08 ns               | $f_1 = 0.5$<br>$\tau_1 = 4,086$ ns<br>$\tau_2 = 6,068$ ns<br>Bi-exponential discrete     | 0,49     |
| 10 $\mu\text{g/ml}$ | 3,36 ns               | $f_1 = 0,4610$<br>$\tau_1 = 0,1469$ ns<br>$\tau_2 = 4,997$ ns<br>Bi-exponential discrete | 1,08     |

**Table S3.** Lifetime measurements for complex 2

| Glutathione         | Average Lifetime (ns) | Fit Model                                                        | Chi-Square |
|---------------------|-----------------------|------------------------------------------------------------------|------------|
| 0 $\mu\text{g/ml}$  | 2,1                   | f1=0,8851<br>$\tau_1 = 0,3710$<br>f2 =0,1326<br>$\tau_2 = 14,88$ | 1,83       |
| 10 $\mu\text{g/ml}$ | 2,75                  | f1=0,8616<br>$\tau_1 = 0,3876$<br>f2 =0,1378<br>$\tau_2 = 17,54$ | 3,4        |

**Table S4.** Lifetime measurements for complex 3

| Cysteine            | Average Lifetime (ns) | Fit Model                                                         | Chi-square |
|---------------------|-----------------------|-------------------------------------------------------------------|------------|
| 0 $\mu\text{g/ml}$  | 1,98                  | f1=0,9111<br>$\tau_1 = 0,3664$<br>f2 =0,0919<br>$\tau_2 = 17,19$  | 2,37       |
| 10 $\mu\text{g/ml}$ | 2,19                  | f1=0,8860<br>$\tau_1 = 0,3638$<br>f2 =0,1215<br>$\tau_2 = =15,34$ | 2,5        |

**Table S5.** Lifetime measurements for complex **3**
